# Supplementary material for: Translating efficient fluorescence into persistent room-temperature phosphorescence by doping bipolar fluorophores into polar polymer matrix
Source: Royal Society of Chemistry journal article supplement (doi:10.1039/d3tc03781a), 2023-12-06
Supplement: d3tc03781a6.pdf [file d3tc03781a6.pdf]

## Electronic Supplementary Information

### **Translating efficient fluorescence into persistent room-temperature phosphorescence by doping bipolar fluorophore into polar polymer matrix**

Mengjiao Dong<sup>a</sup>, Liyun Liao<sup>b</sup>, Chensheng Li<sup>a</sup>, Yingxiao Mu<sup>b\*</sup>, Yanping Huo<sup>b</sup>, Zhong-Min Su<sup>c</sup>, and Fu-Shun Liang<sup>a\*</sup>

*<sup>a</sup>Institute of Organic Luminescent Materials (IOLM), College of Chemistry, Liaoning University, Shenyang 110036, PR China*

*<sup>b</sup>School of Chemical Engineering and Light Industry, Guangdong University of Technology, Guangzhou 510006, PR China*

*<sup>c</sup>College of Chemistry, Jilin University, Changchun 130021, PR China*

## Content

- 1. Materials**
- 2. Experimental section**
- 3. Measurements and methods**
- 4. Supplementary figures and tables**

## 1. Materials

Coumarin (**Cum**), 7-amino-4-methylcoumarin (**7-AMCum**), 7-hydroxy-4-methylcoumarin (**7-HMCum**) and 7-diethylamino-4-methylcoumarin (**7-DEAMCum**) were purchased from Adamas. Polyacrylic acid (PAA,  $M_w = 2000$  g/mol), polyacrylonitrile (PAN,  $M_w = 150000$  g/mol), polymethyl methacrylate (PMMA) and polystyrene (PS,  $M_w = 104.14$  g/mol) were purchased from Adamas. Polyvinyl alcohol (PVA) with the alcoholysis degree of 87-89% was purchased from General-reagent. All the guests were used with recrystallization for three times and all the hosts were used directly without further purification.

## 2. Experimental section

### Preparation of polymer solutions

PAA (1.2 g) was added in deionized water (40 mL) and stirred at room temperature for 30 min, the PAA solution (15 mg/mL) was obtained. Similarly, PVA (0.6 g) was dissolved in H<sub>2</sub>O (40 mL) at 95 °C for 2 h, PAN (0.6 g) was dissolved in N, N-dimethylformamide (DMF) (40 mL) at room temperature for 1 h, PMMA (0.6 g) was dissolved in acetone (40 mL) at 65 °C for 2 h and PS (0.6 g) was dissolved in tetrahydrofuran (THF) (40 mL) at room temperature for 1 h, the PVA, PAN, PMMA, PS solutions (15 mg/mL) were obtained. All the solutions were used for the following experiments.

### Preparation of doped polymer films

**Cum**, **7-HMCum**, **7-AMCum** and **7-DEAMCum** (0.1 mg/mL for each chromophore) were dispersed in the aqueous PAA solution (15 mg/mL), respectively, and each solution was ultrasonicated for 1 h. Then, the films were produced with the drop-casting approach on a 20 mm × 20 mm piezoid substrate. After drying at 100 °C for 2 h, transparent films were obtained.

## 3. Measurements and methods

### Instruments

The UV-Vis absorption spectra were determined on a Perkin Elmer Lambda35 UV-vis spectrometer. The photoluminescence spectra, phosphorescence spectra, the lifetimes of phosphorescence spectra and the photoluminescence quantum efficiency were performed at room temperature on a FLS980 Series of Fluorescence Spectrometers. All the photos were taken by Apple 12 camera.

### Computational details

Time-dependent density functional theory (TD-DFT) calculations were performed using Gaussian 16 based on b3lyp6-311g (d,p) level, the excited state energy level, oscillator strength ( $f$ ), and spin-orbit coupling constant ( $\xi$ ) of **7-AMCum** were provided.

### Phosphorescence quantum yields

The phosphorescence quantum yields of all the doped films were obtained following the equation

$$\Phi_P = \frac{B}{A} \times \Phi_{PL}$$

where A and B represent the integral areas of total photoluminescence and phosphorescence spectra, respectively. The  $\phi_{PL}$  represent the total quantum efficiency of photoluminescence. This method has been reported in previous literature (Jiang, J. Zhi, Y. Wang, H. Yang, W. Zhu, Z. An, *Angew. Chem. Int. Ed.* **2021**, 60, 20058).

#### The detail for the security protection application

The information encryption pattern is processed into the desired shape with the aid of silicone rubber mold. The ink based on ground **7-HMCum@PVA**, **7-AMCum@PVA** and **7-DEAMCum@PVA** solutions were firstly added into silicone rubber mold. Then the pattern with  $\rho$ RTP was obtained after drying at 100 °C for 2 h.

#### 4. Supporting figures and tables

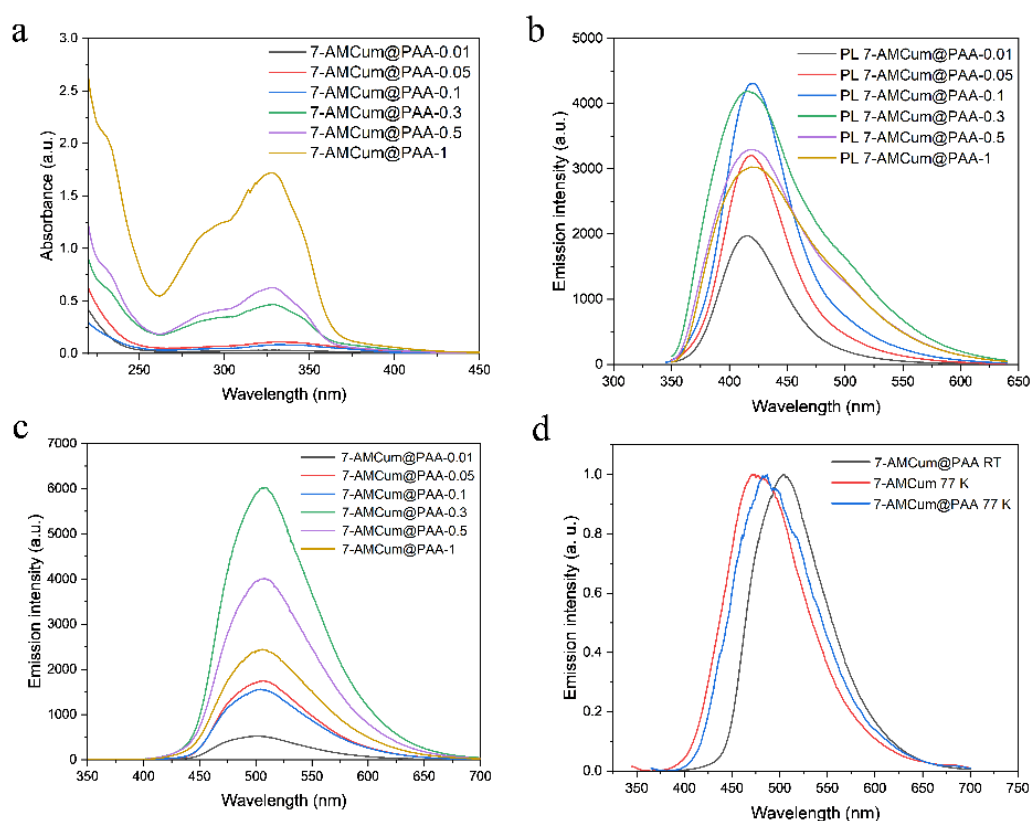

**Fig. S1** (a) UV-Vis absorption spectra of **7-AMCum@PAA** at different concentrations under ambient conditions. (b) Normalized PL spectra of **7-AMCum@PAA** at different concentrations under ambient conditions ( $\lambda_{ex} = 350$  nm). (c) Delayed spectra of **7-AMCum@PAA** at different concentrations under ambient conditions (delayed time = 8 ms;  $\lambda_{ex} = 350$  nm). (d) Delayed spectra of **7-AMCum@PAA** at ambient conditions, **7-AMCum** in EtOH (concentration =  $1.0 \times 10^{-5}$  M) at 77 K and **7-AMCum@PAA** at 77 K ( $\lambda_{ex} = 350$  nm).

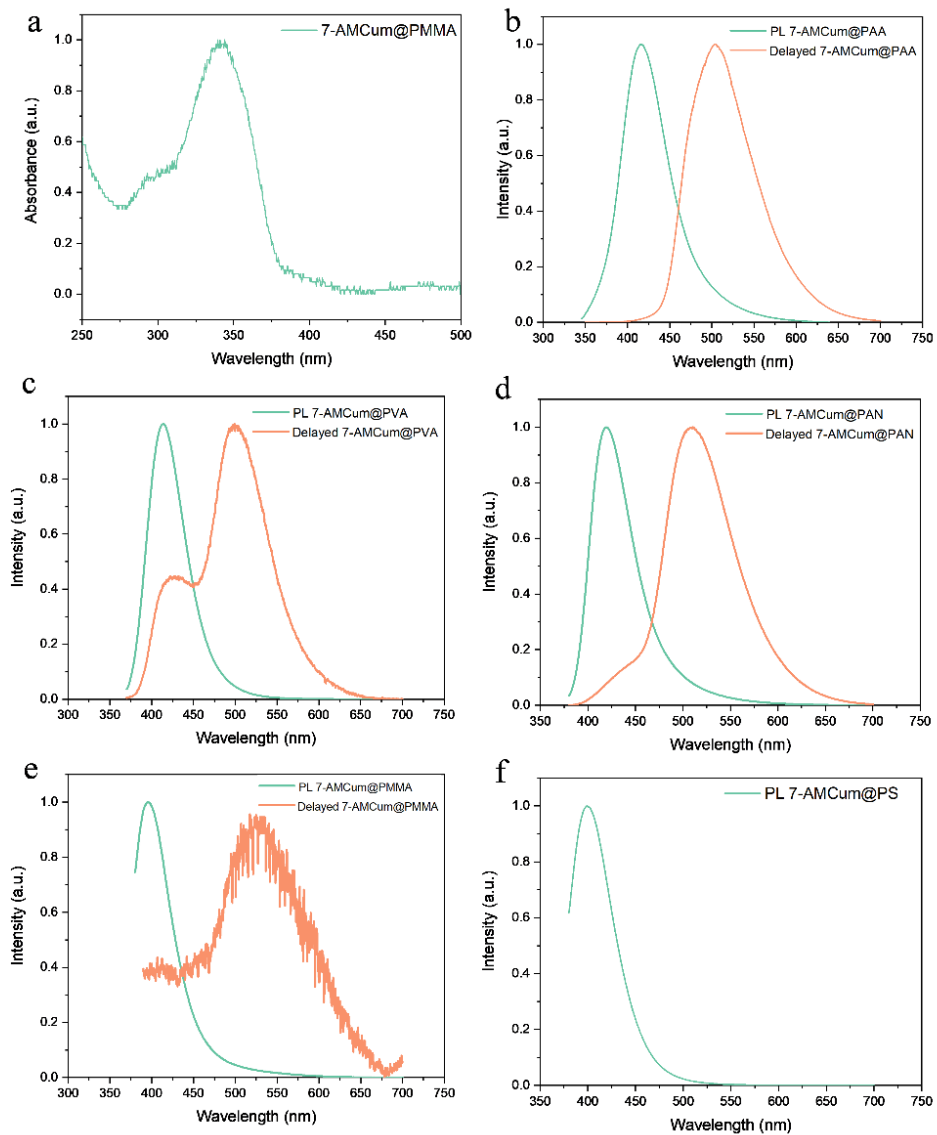

**Fig. S2** (a) UV-Vis absorption spectra of **7-AMCum@PMMA** under ambient conditions. Normalized PL and delayed spectra of (b) **7-AMCum@PAA** (c) **7-AMCum@PVA** (d) **7-AMCum@PAN** (e) **7-AMCum@PMMA** under ambient conditions (delayed time = 8 ms;  $\lambda_{\text{ex}} = 350$  nm). (f) Normalized PL spectra of **7-AMCum@PS** under ambient conditions ( $\lambda_{\text{ex}} = 350$  nm).

**Table S1** Photophysical parameters of **7-AMCum** doped in different hosts at 0.1mg/mL doping concentration.

| Doped films <sup>a</sup> | $\lambda_F$ (nm) <sup>b</sup> | $\lambda_P$ (nm) <sup>c</sup> | $\Delta E_{ST}$ (eV) <sup>d</sup> |
|--------------------------|-------------------------------|-------------------------------|-----------------------------------|
| 7-AMCum@PAA              | 415                           | 504                           | 0.53                              |
| 7-AMCum@PVA              | 413                           | 504                           | 0.54                              |
| 7-AMCum@PAN              | 419                           | 506                           | 0.51                              |
| 7-AMCum@PMMA             | 395                           | 506                           | 0.69                              |

<sup>a</sup> The concentration of guests and polymer matrices were 0.1 mg/mL and 15 mg/mL, respectively. To prepare films, the guest and polymer matrix were doped by 1:1. <sup>b</sup> Fluorescence emission maxima of steady-state photoluminescence spectra. <sup>c</sup> pRTP maxima of delayed emission spectra. <sup>d</sup> The difference value of energy level between singlet state and triplet state.

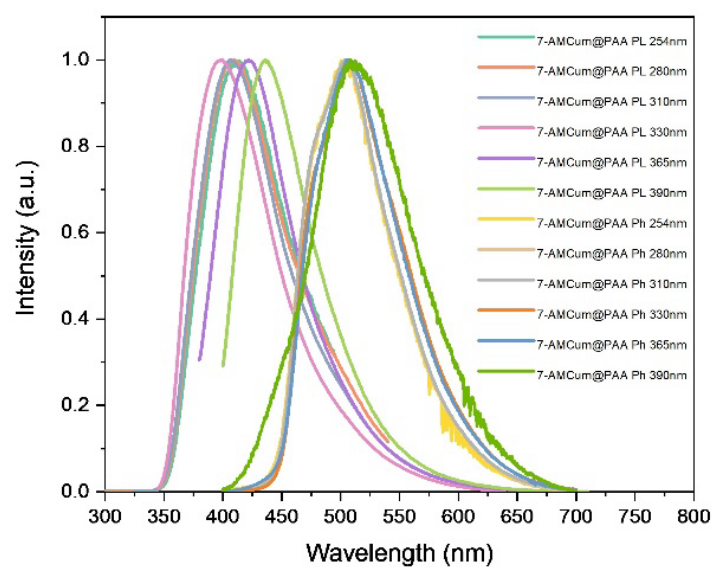

**Fig. S3** PL and phosphorescence spectra of **7-AMCum@PAA** under different excitation wavelength.

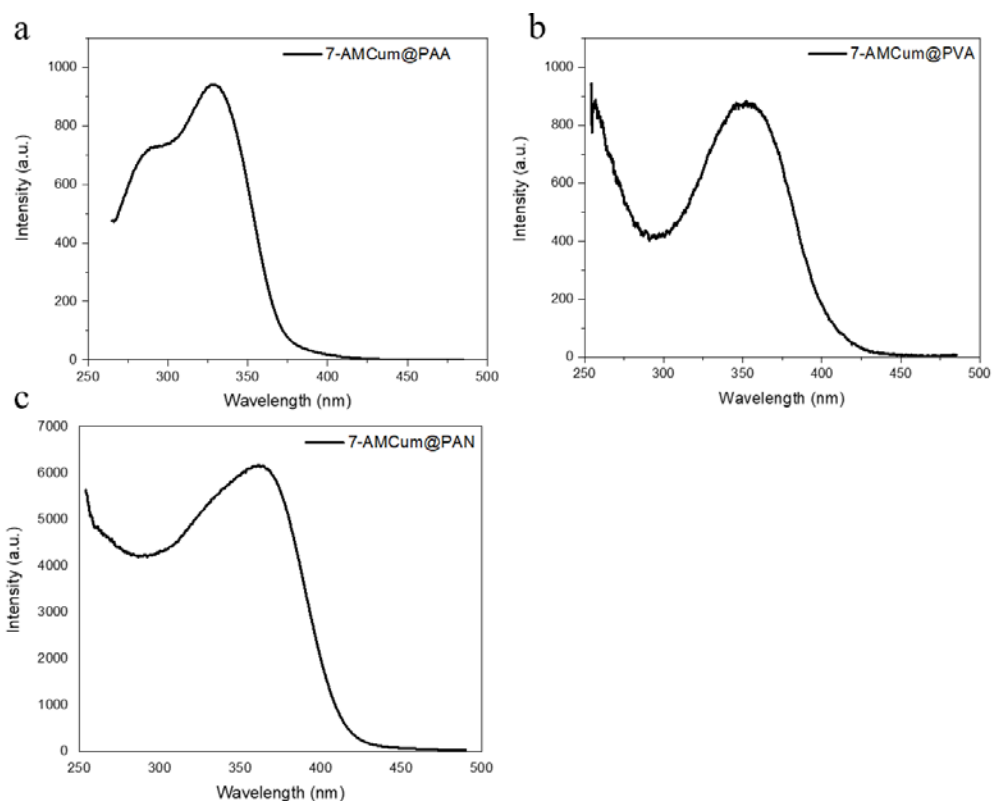

**Fig. S4** Excitation spectra of **7-AMCum@PAA** (a), **7-AMCum@PVA**(b) and **7-AMCum@PAN** (c) at 0.1 mg/mL under ambient conditions ( $\lambda_{ex} = 500$  nm).

**Table S2** Photophysical parameters of **7-AMCum** doped in different hosts at 0.1mg/mL doping concentration.

| Doped films <sup>a</sup> | $\phi_{PL}$ (%) <sup>b</sup> | $\phi_p$ (%) <sup>c</sup> | $\tau_p$ (ms) <sup>d</sup> | $k_p$ (s <sup>-1</sup> ) <sup>e</sup> | $k_{nr}$ (s <sup>-1</sup> ) <sup>f</sup> |
|--------------------------|------------------------------|---------------------------|----------------------------|---------------------------------------|------------------------------------------|
| 7-AMCum@PAA              | 8.00                         | 4.48                      | 1000                       | $4.48 \times 10^{-2}$                 | $9.55 \times 10^{-1}$                    |
| 7-AMCum@PVA              | 74.52                        | 12.44                     | 294                        | $4.23 \times 10^{-1}$                 | 2.98                                     |
| 7-AMCum@PAN              | 31.63                        | 5.54                      | 178                        | $3.11 \times 10^{-1}$                 | 5.31                                     |

<sup>a</sup> The concentration of guests and polymer matrices were 0.1 mg/mL and 15 mg/mL, respectively. To prepare films, the guest and polymer matrix were doped by 1:1. <sup>b</sup> Fluorescence and phosphorescence emission maxima of steady-state photoluminescence spectra and phosphorescence spectra. <sup>c</sup> Fluorescence quantum yield. <sup>d</sup> Phosphorescence quantum yield. <sup>e</sup> Phosphorescence lifetime at room temperature. <sup>f</sup>  $k_p$  and <sup>g</sup>  $k_{nr}$  are the radiative rate constant and nonradiative rate constant of  $T_1$  state, respectively.  $k_p = \phi_p / \tau_p$ ;  $k_{nr} = (1 - \phi_p) / \tau_p$ .

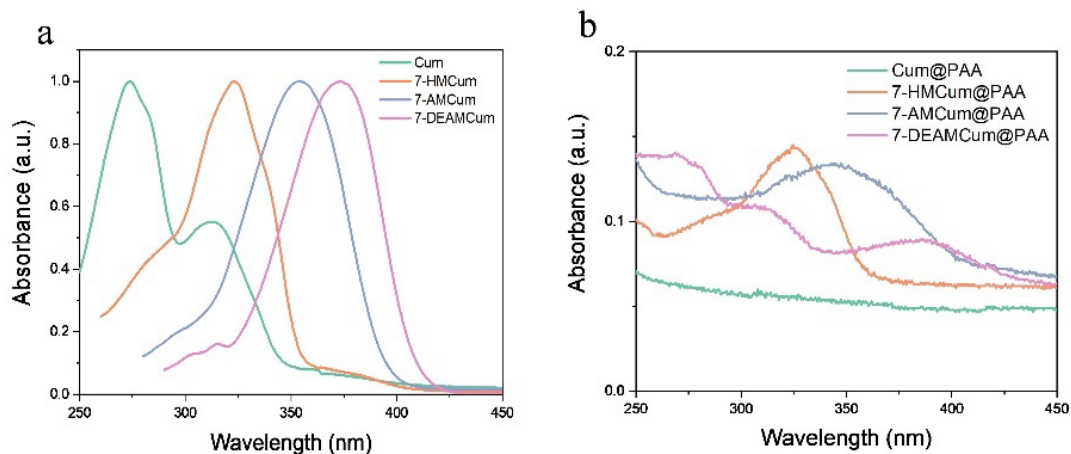

**Fig. S5** (a) UV-Vis absorption spectra of guests in EtOH under ambient conditions (concentration =  $1.0 \times 10^{-5}$  M). (b) UV-Vis absorption spectra of **Cum@PAA**, **7-HMCum@PAA**, **7-AMCum@PAA** and **7-DEAMCum@PAA** under ambient conditions (0.1 mg/mL).

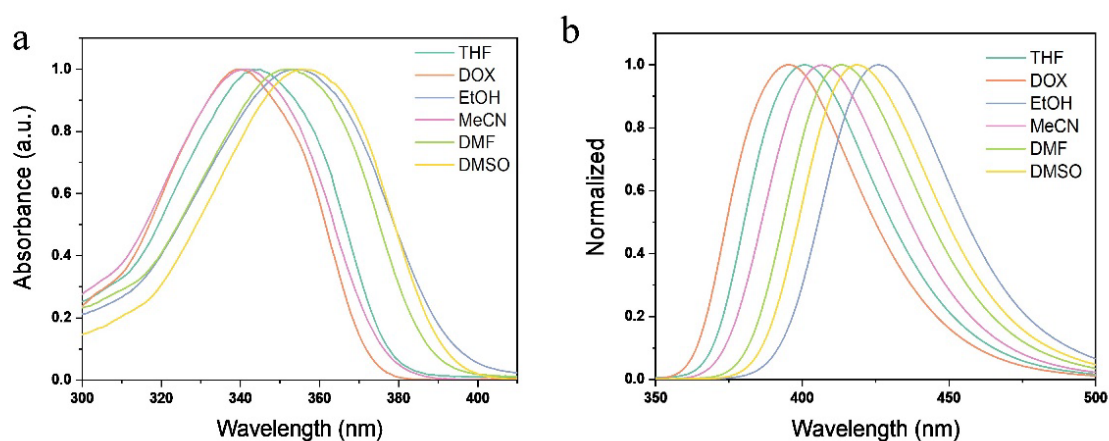

**Fig. S6** (a) UV-Vis absorption spectra of **7-AMCum** in different solvents (concentration =  $1.0 \times 10^{-5}$  M) under ambient conditions. (b) PL spectra of **7-AMCum** in different solvents (concentration =  $1.0 \times 10^{-5}$  M) under ambient conditions ( $\lambda_{\text{ex}} = 350$  nm).

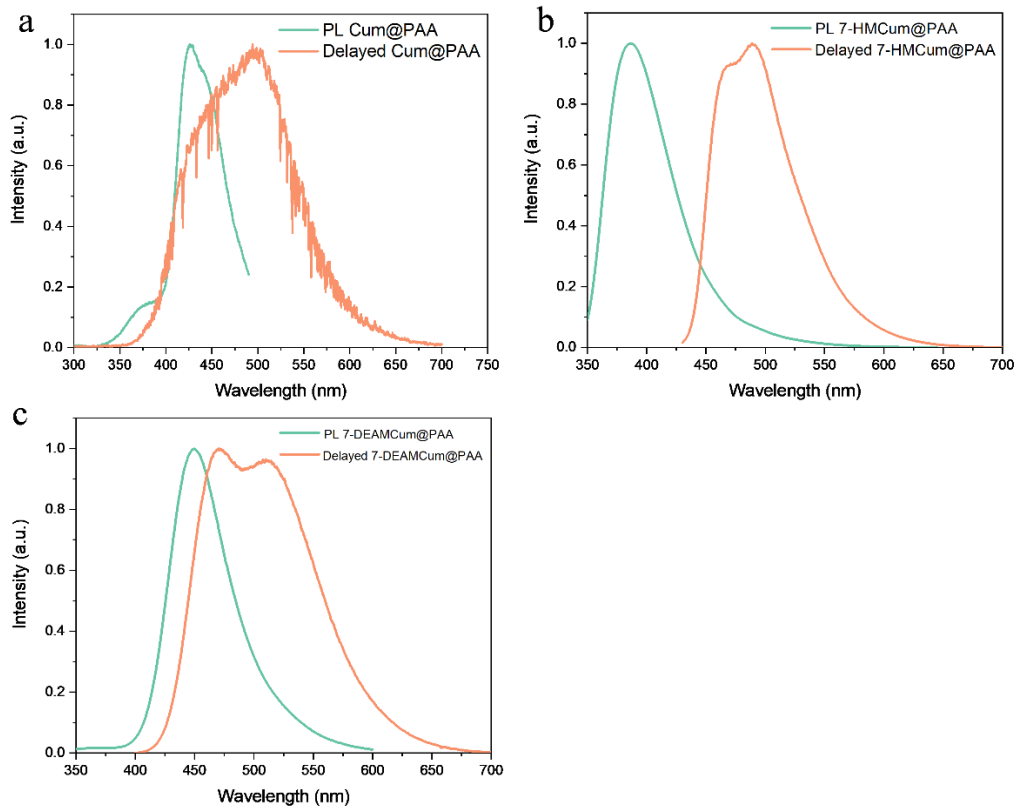

**Fig. S7** Normalized PL and delayed spectra of (a) **Cum@PAA** (b) **7-HMCum@PAA** (c) **7-DEAMCum@PAA** at room temperature ( $\lambda_{ex} = 280, 330, 300$  nm, respectively).

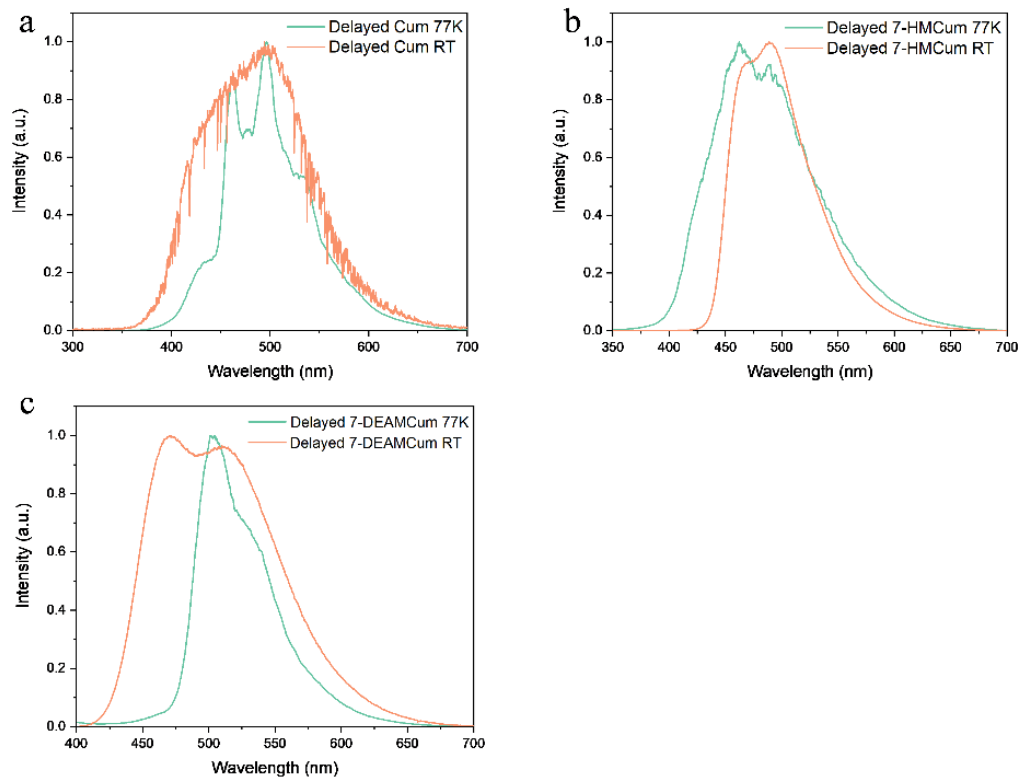



**Fig. S8** Delayed spectra of (a) **Cum** (b) **7-HMCum** (c) **7-DEAMCum** in EtOH (concentration =  $1.0 \times 10^{-5}$  M) at 77 K ( $\lambda_{\text{ex}}$  = 280, 365, 365 nm, respectively) and in films under ambient conditions.

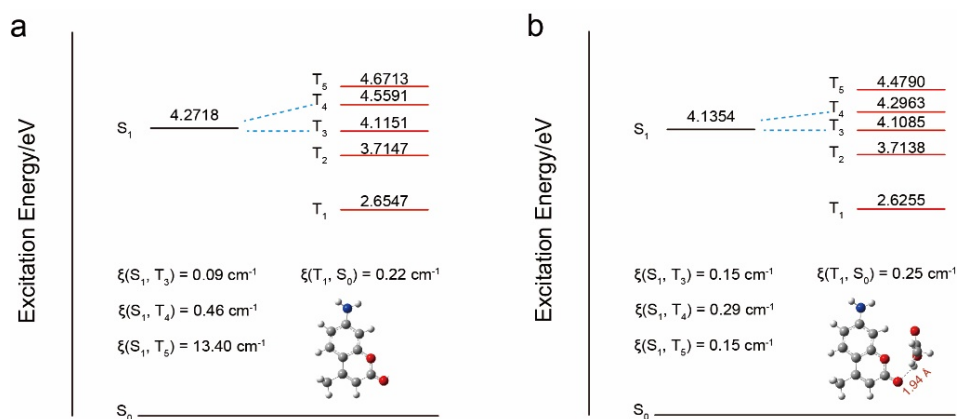

**Fig. S9** Calculated  $S_1$  and  $T_n$  energy levels and SOC matrix element values between  $S_1$  and  $T_n$  states of (a) **7-AMCum**, (b) **7-AMCum** in acetic acid.

**Table S3** Calculated NTO pairs and energy levels of the excited singlet and triplet states of **7-AMCum** (b3lyp 6-311g (d, p) basis set).

| State | Hole | Particle | Excitation energy |
|-------|------|----------|-------------------|
| $S_1$ |      |          | 4.27 eV           |
| $T_1$ |      |          | 2.65 eV           |
| $T_2$ |      |          | 3.71 eV           |
| $T_3$ |      |          | 4.12 eV           |
| $T_4$ |      |          | 4.56 eV           |
| $T_5$ |      |          | 4.67 eV           |

**Table S4** Calculated NTO pairs and energy levels of the excited singlet and triplet states of **7-AMCum** (b3lyp 6-311g (d, p) basis set, in acetic acid).

| State          | Hole                                                                              | Particle                                                                          | Excitation energy |
|----------------|-----------------------------------------------------------------------------------|-----------------------------------------------------------------------------------|-------------------|
| S <sub>1</sub> |  |  | 4.14 eV           |
| T <sub>1</sub> |  |  | 2.63 eV           |
| T <sub>2</sub> |  |  | 3.71 eV           |
| T <sub>3</sub> |  |  | 4.11 eV           |
| T <sub>4</sub> |  |  | 4.30 eV           |
| T <sub>5</sub> |  |  | 4.48 eV           |

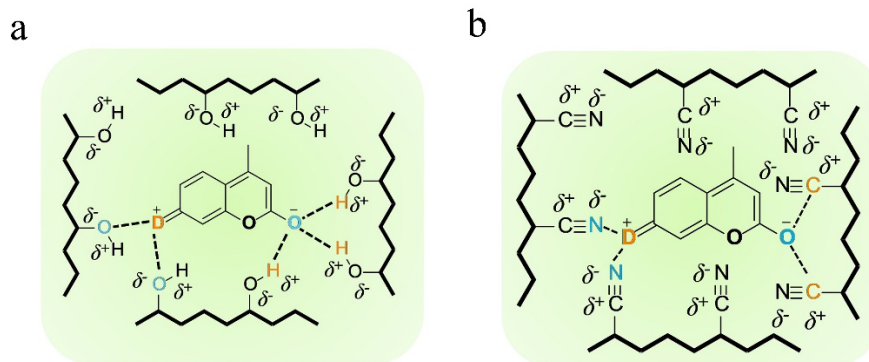

**Fig. S10** Stabilizing the charge separated state of polar coumarin by polar (a) PVA, (b) PAN host under first excited singlet state (S<sub>1</sub>).
